# Supplementary material for: Pyochelin, a siderophore of Pseudomonas aeruginosa: Physicochemical characterization of the iron(iii), copper(ii) and zinc(ii) complexes
Source: Royal Society of Chemistry journal article supplement (doi:10.1039/c1dt11804h), 2012-01-01
Supplement: c1dt11804h.pdf [file c1dt11804h.pdf]

# Pyochelin, a siderophore of *Pseudomonas aeruginosa* : Physicochemical characterization of the iron(III), copper(II) and zinc(II) complexes

Jérémy Brandel,<sup>a,c</sup> Nicolas Humbert,<sup>a</sup> Mourad Elhabiri,<sup>d</sup> Isabelle J. Schalk,<sup>b</sup>  
Gaëtan L. A. Mislin,<sup>\*b</sup> Anne-Marie Albrecht-Gary<sup>\*a</sup>

<sup>a</sup> Laboratoire de Physico-Chimie Bioinorganique, Institut de Chimie, UMR 7177 CNRS, Université de Strasbourg, ECPM, 25 rue Becquerel 67200 Strasbourg, France. Fax: 33 (0) 3 68 85 26 39; Tel: 33 (0) 3 68 85 26 38. E-mail : [amalbre@unistra.fr](mailto:amalbre@unistra.fr).

<sup>b</sup> Equipe "Transports Membranaires Bactériens", Biotechnologie et Signalisation Cellulaire UMR7242, Boulevard Sébastien Brant, F-67412 Illkirch Cedex, France. Fax: 33 (0) 3 68 85 48 29; Tel: 33 (0) 3 68 85 47 27. E-mail: [mislin@unistra.fr](mailto:mislin@unistra.fr).

<sup>c</sup> Equipe Reconnaissance et Procédés de Séparation Moléculaire (RePSeM), Université de Strasbourg, IPHC, 25 rue Becquerel 67087 Strasbourg, France - CNRS, UMR7178, 67037 Strasbourg, France.

<sup>d</sup> Laboratoire de Chimie Bioorganique et Médicinale, UMR 7509 CNRS, Université de Strasbourg, ECPM, 25 rue Becquerel, 67200 Strasbourg, France.

## Supporting Information Available

|            |    |
|------------|----|
| Figure S1  | 2  |
| Figure S2  | 3  |
| Figure S3  | 4  |
| Figure S4  | 5  |
| Figure S5  | 6  |
| Figure S6  | 7  |
| Figure S7  | 8  |
| Figure S8  | 9  |
| Figure S9  | 10 |
| Figure S10 | 11 |
| Figure S11 | 12 |
| Figure S12 | 13 |
| Figure S13 | 14 |
| Figure S14 | 15 |
| Figure S15 | 16 |
| Figure S16 | 17 |
| Figure S17 | 18 |
| Table S1   | 19 |
| Table S2   | 20 |
| Table S3   | 21 |
| Table S4   | 22 |

\* To whom correspondence should be addressed: [mislin@unistra.fr](mailto:mislin@unistra.fr)

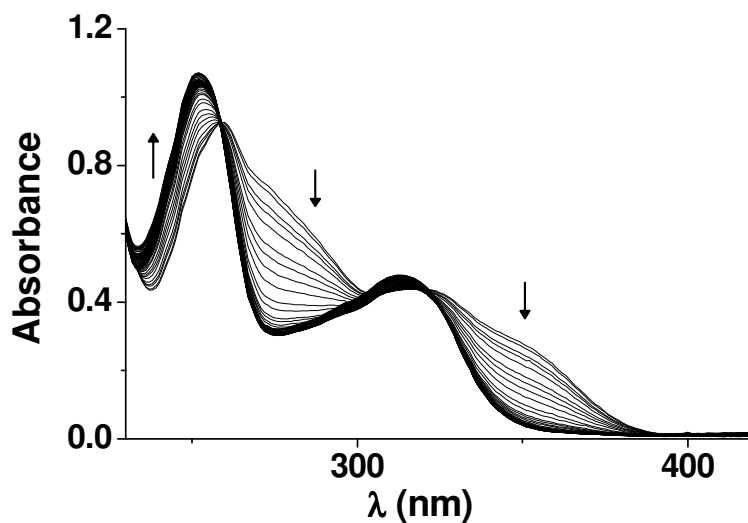

(a)

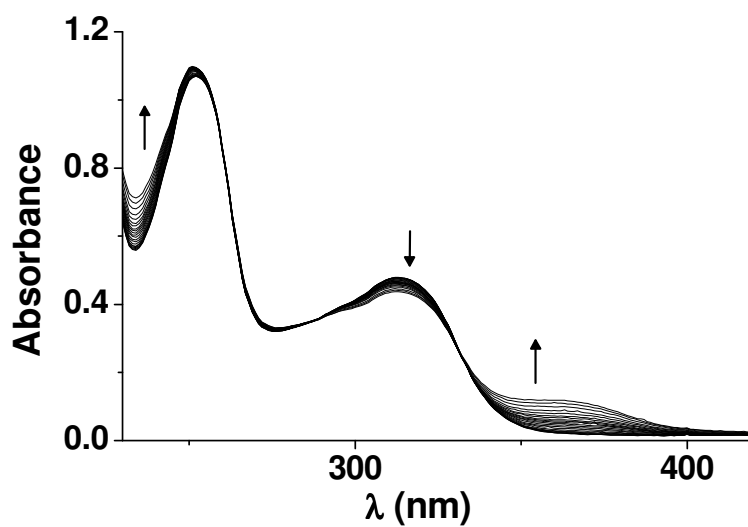

(b)

**Figure S1.** Spectrophotometric versus p[H] titration of pyochelin. Solvent: CH<sub>3</sub>OH/H<sub>2</sub>O (80/20 by weight);  $I = 0.1$  M ((C<sub>2</sub>H<sub>5</sub>)NClO<sub>4</sub>);  $T = 25.0(2)$  °C;  $\ell = 1$  cm;  $[L]_{\text{tot}} = 1.03 \times 10^{-4}$  M; a)  $2.54 < \text{p[H]} < 9.24$ ; b)  $9.24 < \text{p[H]} < 12.10$ .

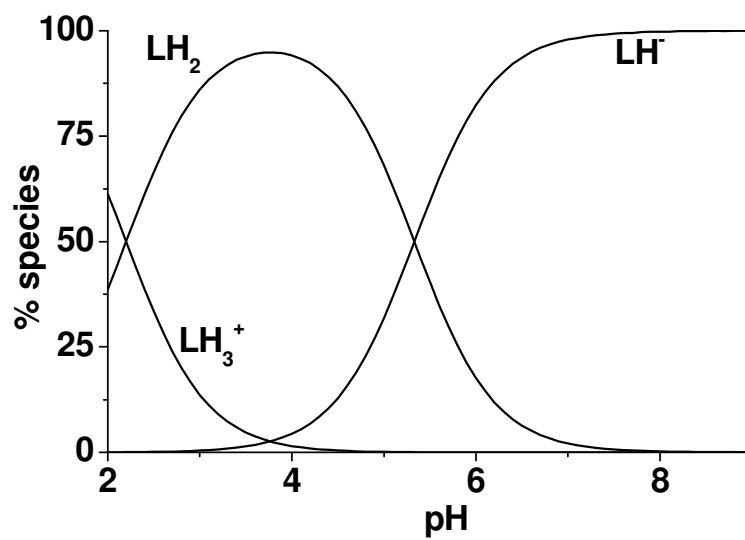

**Figure S2.** Distribution diagrams of the protonated species of pyochelin.  $[L]_{\text{tot}} = 1.03 \times 10^{-4}$  M; solvent:  $\text{CH}_3\text{OH}/\text{H}_2\text{O}$  (80/20 by weight);  $I = 0.1$  M  $((\text{C}_2\text{H}_5)_4\text{NClO}_4)$ ;  $T = 25.0(2)$  °C.

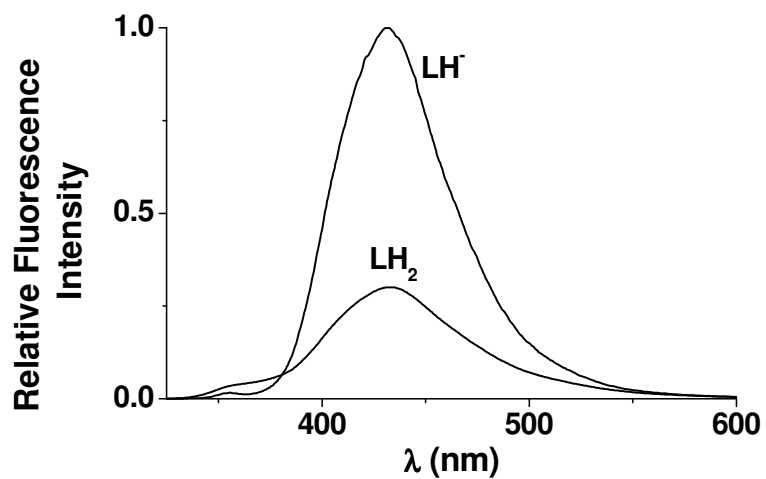

**Figure S3.** Relative recalculated emission spectra of the protonated species of pyochelin. Solvent: CH<sub>3</sub>OH/H<sub>2</sub>O (80/20 by weight);  $I = 0.1$  M ((C<sub>2</sub>H<sub>5</sub>)<sub>4</sub>NClO<sub>4</sub>);  $T = 25.0(2)$  °C. LH<sub>3</sub><sup>+</sup> is considered as a not emitting species.

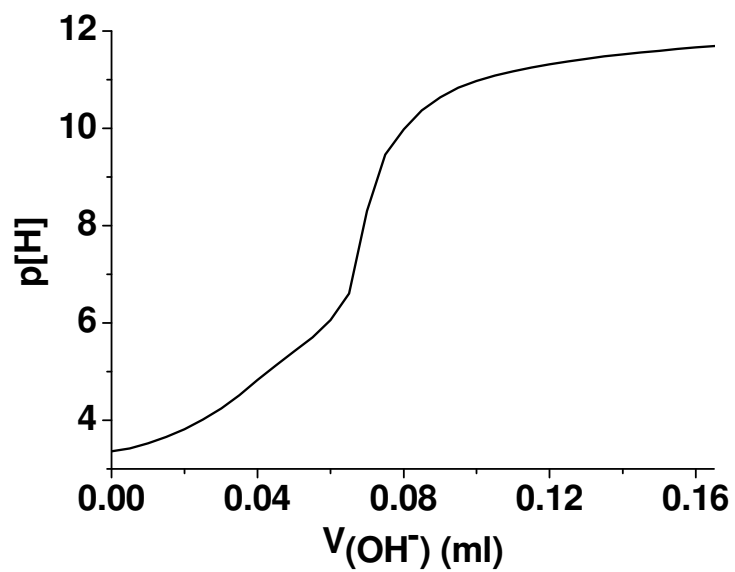

**Figure S4.** Potentiometric titration curve of pyochelin Fe(III) complexes.  $[\mathbf{L}]_{\text{tot}} = 1.50 \times 10^{-3}$  M;  $[\text{Fe(III)}]_{\text{tot}}/[\mathbf{L}]_{\text{tot}} = 0.21$ ;  $3.36 < \text{p}[\text{H}] < 11.69$ ; solvent:  $\text{CH}_3\text{OH}/\text{H}_2\text{O}$  (80/20 by weight);  $T = 25.0(2)$  °C;  $I = 0.1$  M  $((\text{C}_2\text{H}_5)_4\text{NClO}_4)$ .

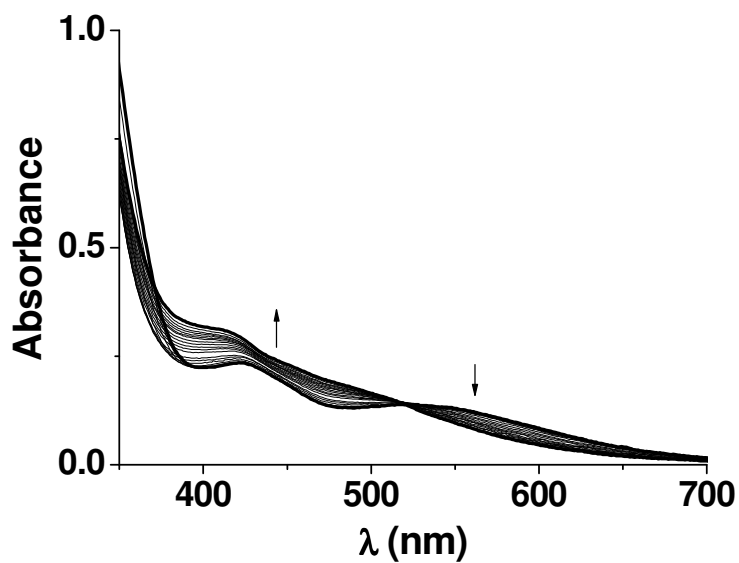

(a)

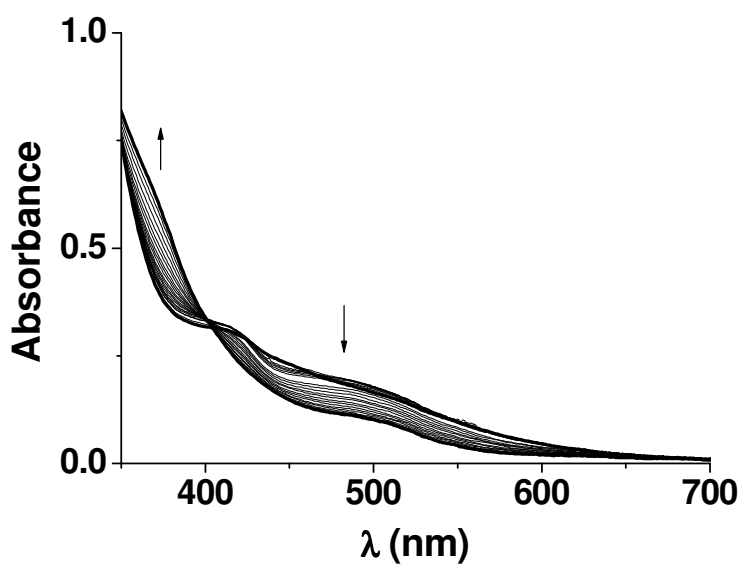

(b)

**Figure S5.** Spectrophotometric titration of the pyochelin Fe(III) complexes from a)  $2.45 < \text{p}[\text{H}] < 7.63$  and from b)  $7.63 < \text{p}[\text{H}] < 11.43$ .  $[\text{L}]_{\text{tot}} = 3.36 \times 10^{-4} \text{ M}$ ;  $[\text{L}]_{\text{tot}} / [\text{Fe(III)}]_{\text{tot}} = 4.0$ ; solvent:  $\text{CH}_3\text{OH}/\text{H}_2\text{O}$  (80/20 by weight);  $T = 25.0 (2) \text{ }^\circ\text{C}$ ;  $I = 0.1 \text{ M } ((\text{C}_2\text{H}_5)_4\text{NClO}_4)$ ;  $\ell = 1 \text{ cm}$ .

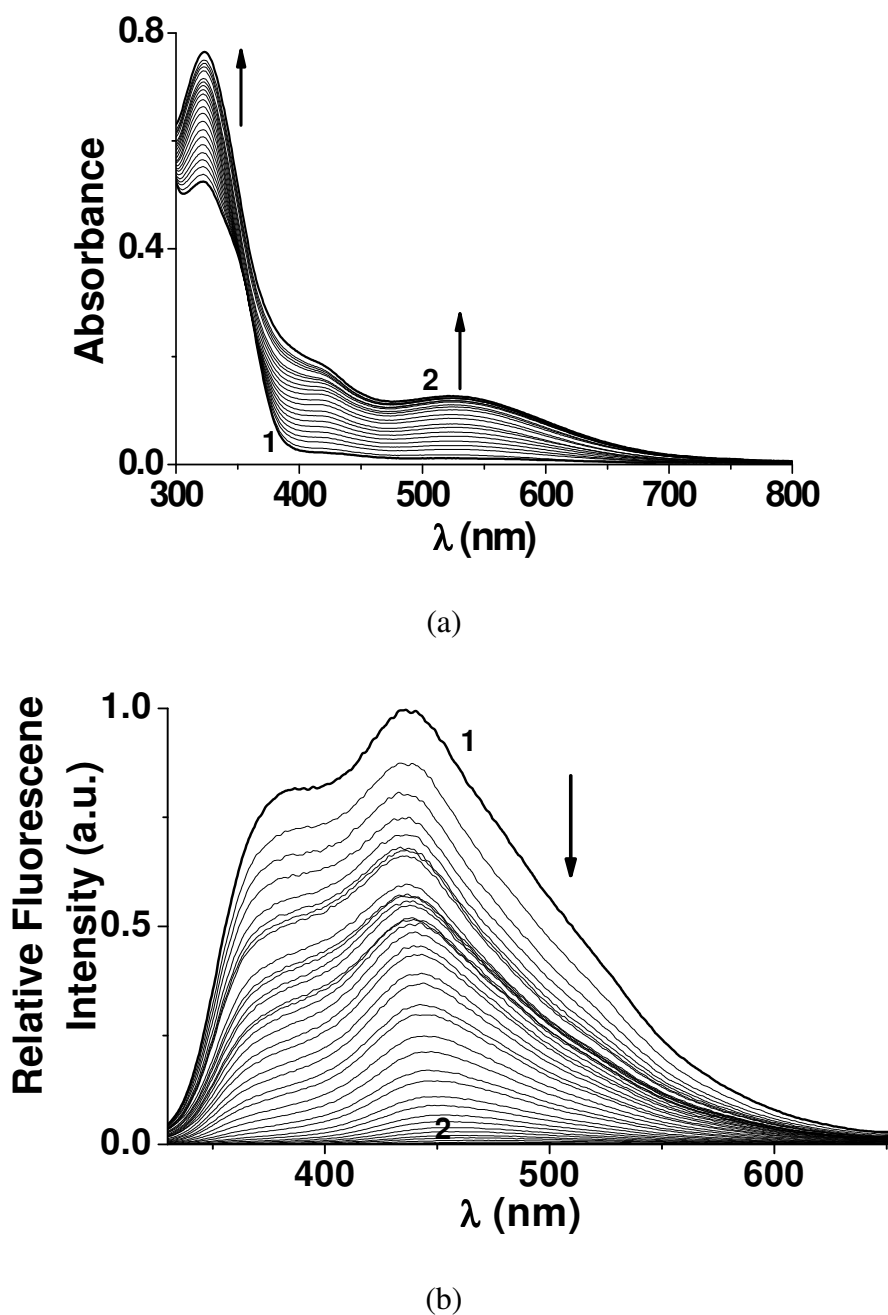

**Figure S6.** Spectrophotometric (absorption (a) and emission (b)) titrations of pyochelin by iron(III) at pH 2. (a) 1)  $[\mathbf{L}]_{\text{tot}} = 1.13 \times 10^{-4}$  M; 2)  $[\text{Fe(III)}]_{\text{tot}} / [\mathbf{L}]_{\text{tot}} = 1.1$ . (b) 1)  $[\mathbf{L}]_{\text{tot}} = 2.02 \times 10^{-5}$  M; 2)  $[\text{Fe(III)}]_{\text{tot}} / [\mathbf{L}]_{\text{tot}} = 111.8$ ;  $\lambda_{\text{exc}} = 322$  nm. Solvent:  $\text{CH}_3\text{OH}/\text{H}_2\text{O}$  (80/20 by weight));  $I = 0.1$  M ( $(\text{C}_2\text{H}_5)_4\text{NClO}_4$ );  $T = 25.0(2)$  °C;  $\ell = 1$  cm.

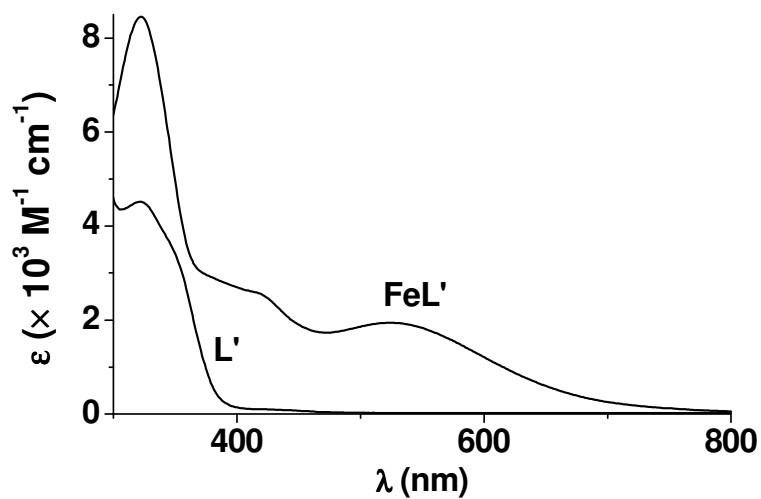

**Figure S7.** Electronic spectra of the pyochelin ferric monochelate complex at p[H] 2. Solvent:  $\text{CH}_3\text{OH}/\text{H}_2\text{O}$  (80/20 by weight);  $I = 0.1 \text{ M } ((\text{C}_2\text{H}_5)_4\text{NClO}_4)$ ;  $T = 25.0(2) \text{ }^\circ\text{C}$ .  $\text{L}'$  designates the protonated pyochelin species at p[H] 2.0.



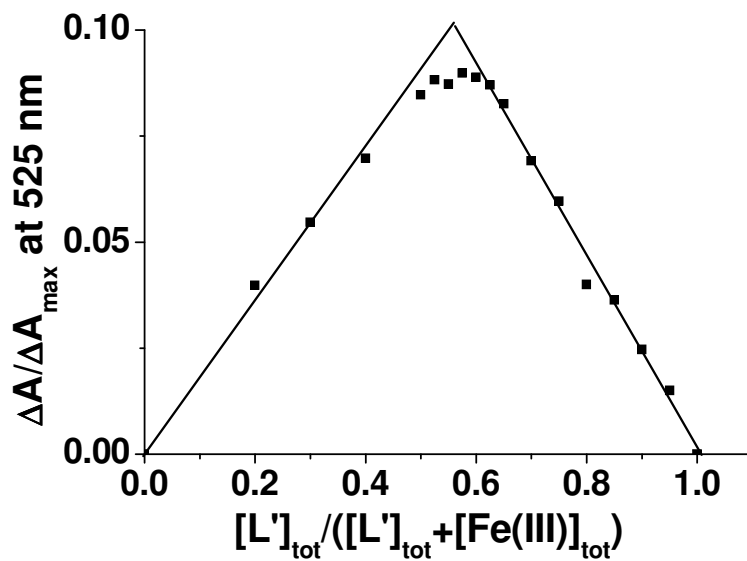

**Figure S8.** Job's plot ( $\Delta A/\Delta A_{\max}$  at 525 nm) upon mixing  $L'$  and  $Fe(III)$  at  $p[H]$  2.0. ( $[L']_{\text{tot}} + [Fe(III)]_{\text{tot}} = 9.95 \times 10^{-5}$  M; solvent: MeOH/H<sub>2</sub>O (80/20 by weight);  $I = 0.1$  M ( $N(C_2H_5)_4ClO_4$ );  $T = 25.0(2)$  °C;  $\ell = 1$  cm.  $L'$  designates the protonated pyochelin species at  $p[H]$  2.0.

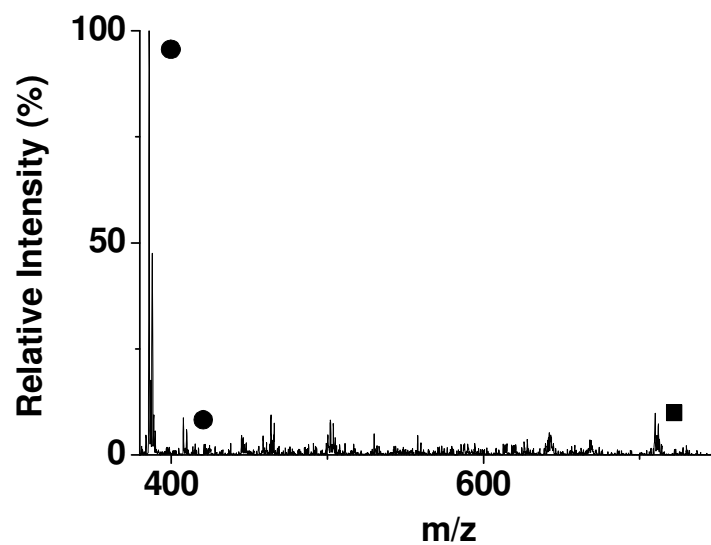

**Figure S9.** ESI-MS spectra of the Cu(II) complexes of pyochelin.  $[\mathbf{L}]_{\text{tot}} = 1.95 \times 10^{-5}$  M;  $[\text{Cu(II)}]_{\text{tot}}/[\mathbf{L}]_{\text{tot}} = 0.49$ ; solvent:  $\text{CH}_3\text{OH}/\text{H}_2\text{O}$  (80/20 by weight);  $\text{p}[\text{H}] \sim 4\text{-}5$ ; positive mode.  $\text{CuL}$  (●),  $\text{CuL}_2$  (■). **L** designates the fully deprotonated ligand.

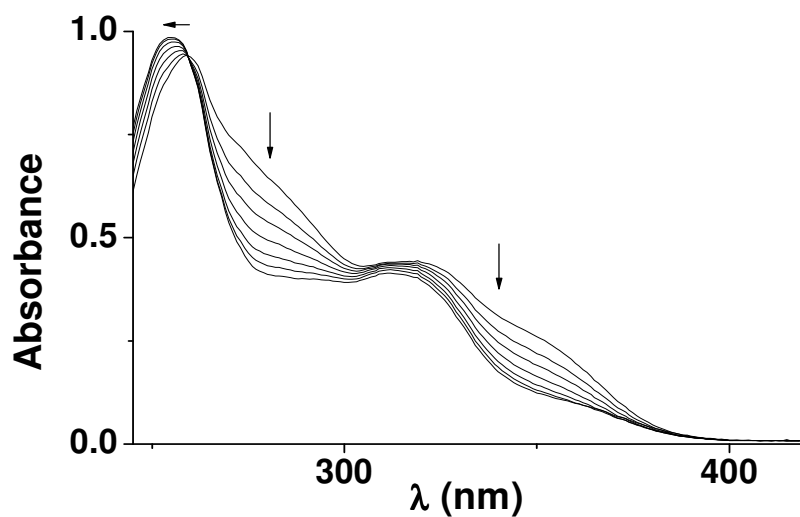

(a)

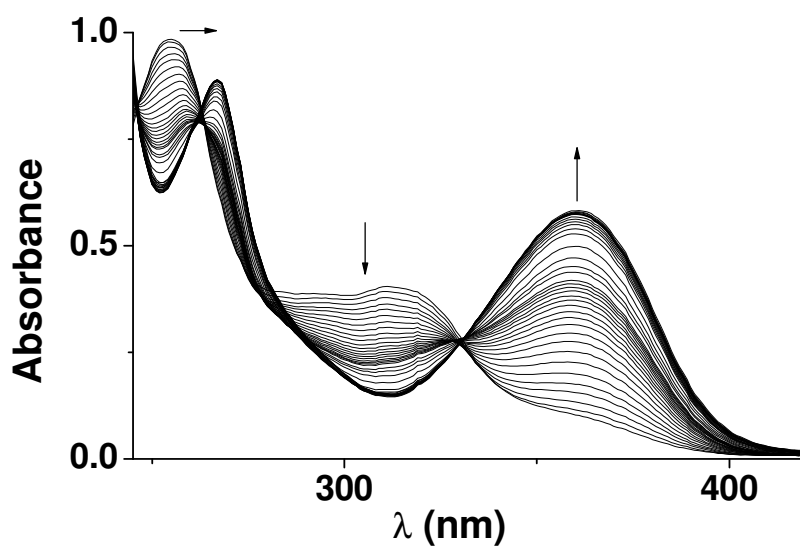

(b)

**Figure S10.** Spectrophotometric titration versus  $p[H]$  of pyochelin Zn(II) complexes.  $[L]_{tot} = 9.68 \times 10^{-5}$  M;  $[Zn(II)]_{tot}/[L]_{tot} = 1.0$ ; a)  $2.34 < p[H] < 3.4$ ; b)  $3.4 < p[H] < 10.26$ ; solvent:  $CH_3OH/H_2O$  (80/20 by weight);  $T = 25(2)$  °C;  $I = 0.1$  M ( $(C_2H_5)_4NClO_4$ );  $l = 1$  cm.

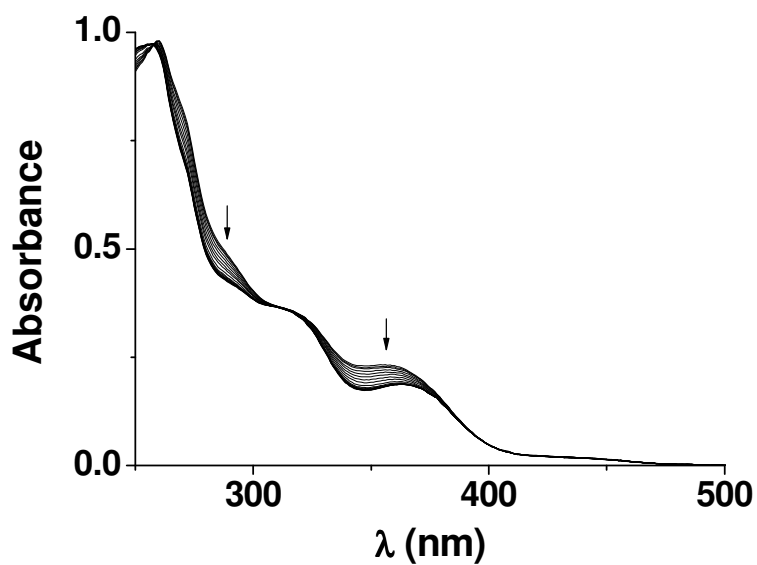

(a)

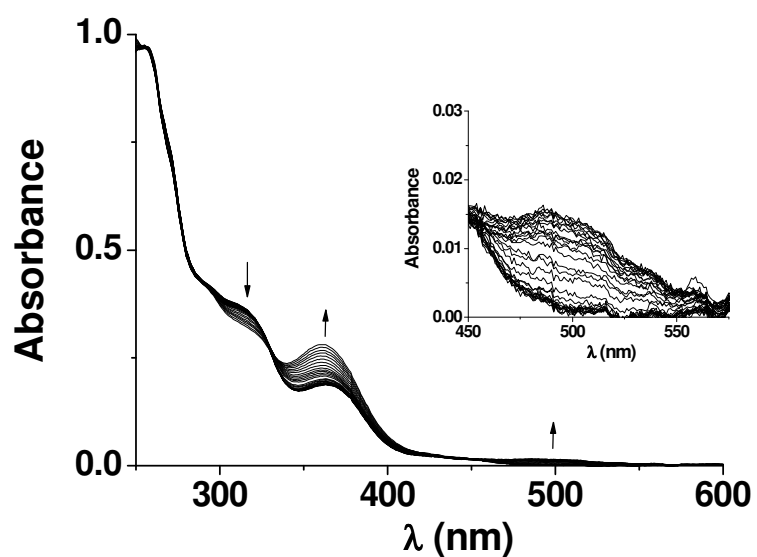

(b)

**Figure S11.** Spectrophotometric titration versus p[H] of the pyochelin cupric complexes.  $[L]_{\text{tot}} = 9.22 \times 10^{-5} \text{ M}$ ;  $[Cu(II)]_{\text{tot}}/[L]_{\text{tot}} = 0.33$ ; a)  $2.68 < p[H] < 4.4$ ; b)  $4.4 < p[H] < 11.48$ ; solvent:  $\text{CH}_3\text{OH}/\text{H}_2\text{O}$  (80/20 by weight);  $T = 25.0(2) \text{ }^\circ\text{C}$ ;  $I = 0.1 \text{ M } ((\text{C}_2\text{H}_5)_4\text{NClO}_4)$ ;  $l = 1 \text{ cm}$ .

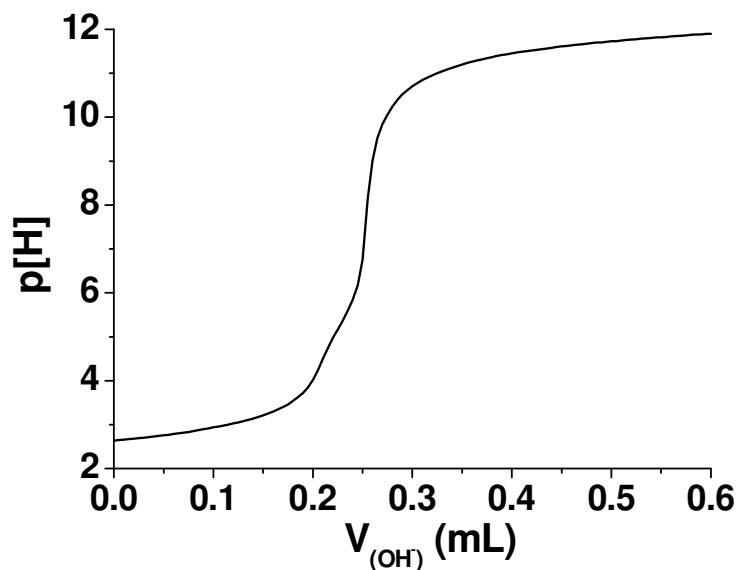

(a)

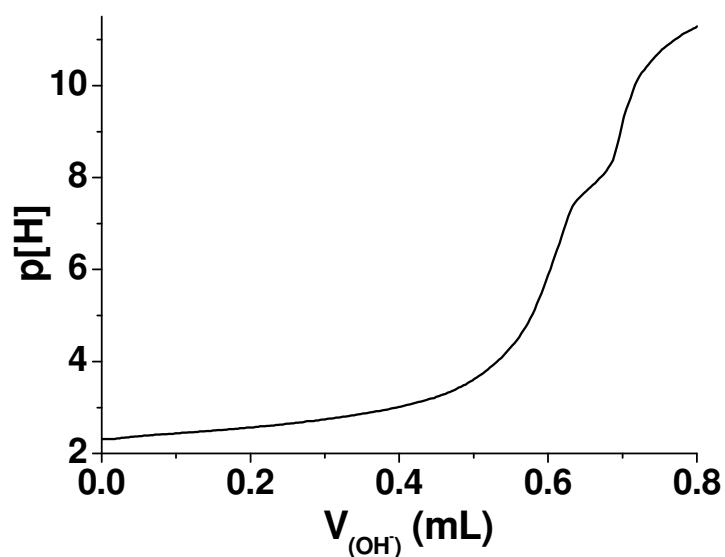

(b)

**Figure S12.** Potentiometric titration of a) pyochelin Cu(II) and b) pyochelin Zn(II) complexes. a)  $[\mathbf{L}]_{\text{tot}} = 1.13 \times 10^{-3} \text{ M}$ ,  $[\text{Cu(II)}]_{\text{tot}}/[\mathbf{L}]_{\text{tot}} = 0.50$ ;  $2.64 < \text{p[H]} < 11.89$ . b)  $[\mathbf{L}]_{\text{tot}} = 1.49 \times 10^{-3} \text{ M}$ ,  $[\text{Zn(II)}]_{\text{tot}}/[\mathbf{L}]_{\text{tot}} = 0.50$ ;  $2.32 < \text{p[H]} < 11.28$ . Solvent:  $\text{CH}_3\text{OH}/\text{H}_2\text{O}$  (80/20 by weight);  $I = 0.1 \text{ M}$  ( $(\text{C}_2\text{H}_5)_4\text{NClO}_4$ );  $T = 25.0(2) \text{ }^\circ\text{C}$ .

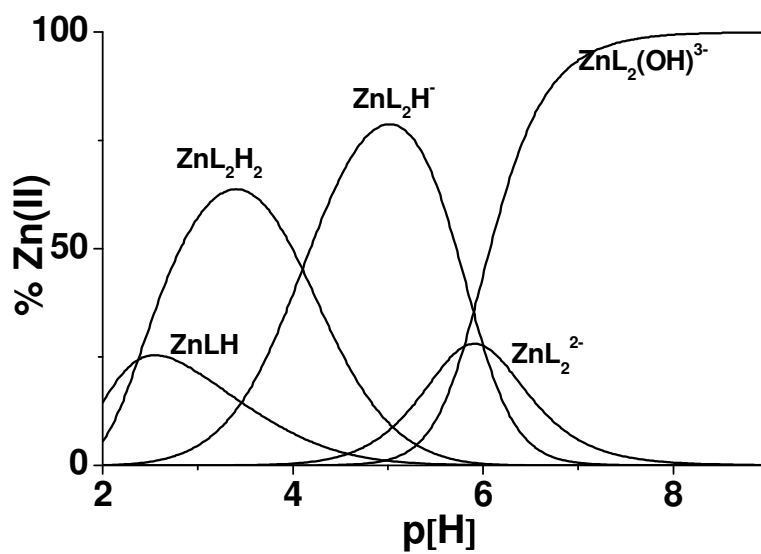

**Figure S13.** Distribution diagrams of the Zn(II) complexes of pyochelin as a function of p[H]. Solvent: CH<sub>3</sub>OH/H<sub>2</sub>O (80/20 by weight); *I* = 0.1 M ((C<sub>2</sub>H<sub>5</sub>)<sub>4</sub>NClO<sub>4</sub>); *T* = 25(2) °C; [Zn(II)]<sub>tot</sub>/[L]<sub>tot</sub> = 0.5, [L]<sub>tot</sub> = 1.49 × 10<sup>-3</sup> M.

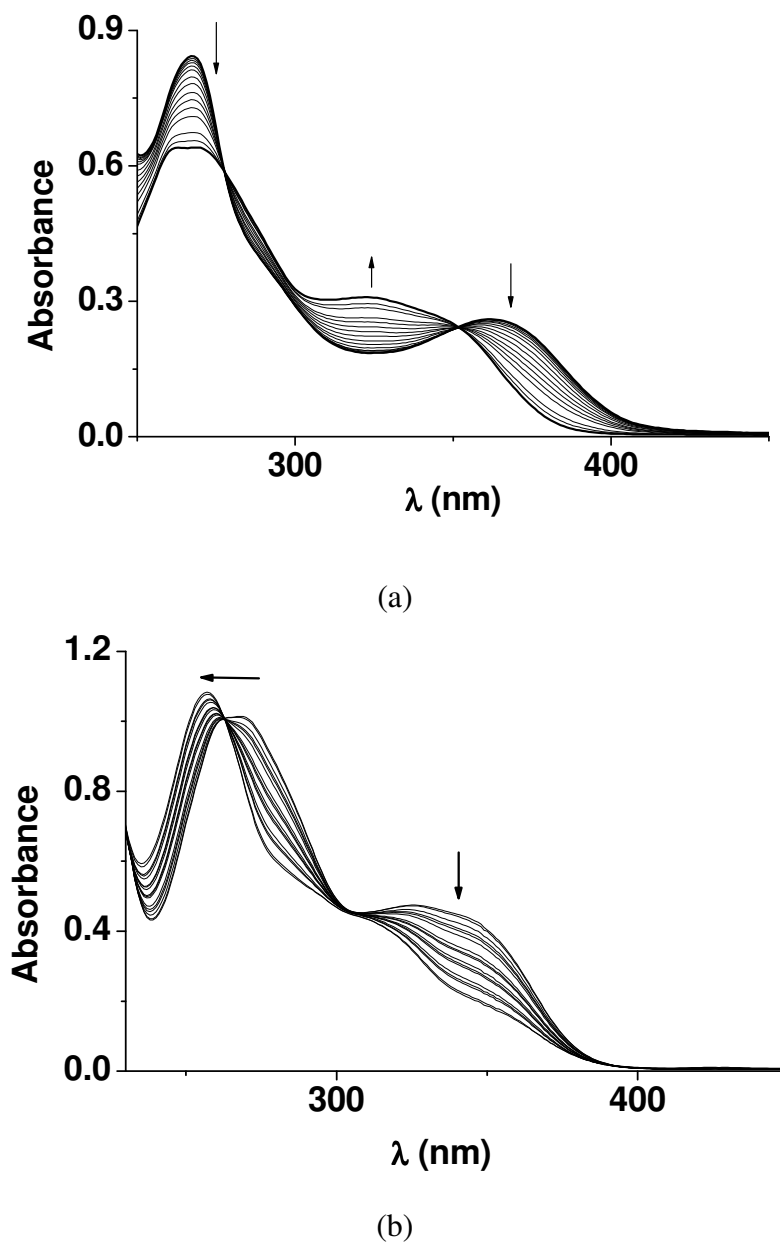

**Figure S14.** Spectrophotometric titrations of pyochelin versus  $[M]_{\text{tot}}$  ((a)  $M = \text{Cu(II)}$ , (b)  $M = \text{Zn(II)}$ ) at  $\text{p[H]} 2.0$ . a)  $[\mathbf{L}']_{\text{tot}} = 6.32 \times 10^{-5} \text{ M}$ ;  $[\text{Cu(II)}]_{\text{tot}}/[\mathbf{L}']_{\text{tot}} = 0.69$ ,  $l = 1 \text{ cm}$ . b)  $[\mathbf{L}']_{\text{tot}} = 1.0 \times 10^{-4} \text{ M}$ ;  $[\text{Zn(II)}]_{\text{tot}}/[\mathbf{L}']_{\text{tot}} = 191.1$ ;  $l = 1 \text{ cm}$ . Solvent:  $\text{CH}_3\text{OH}/\text{H}_2\text{O}$  (80/20 by weight);  $I = 0.1 \text{ M}$  ( $(\text{C}_2\text{H}_5)_4\text{NClO}_4$ );  $T = 25.0 (2) \text{ }^\circ\text{C}$ .  $\mathbf{L}'$  designates the protonated pyochelin species at  $\text{p[H]} 2.0$ .

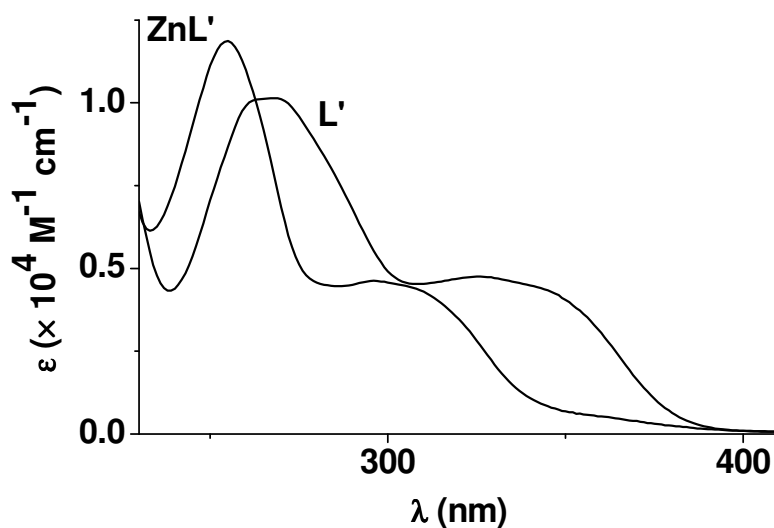

(a)

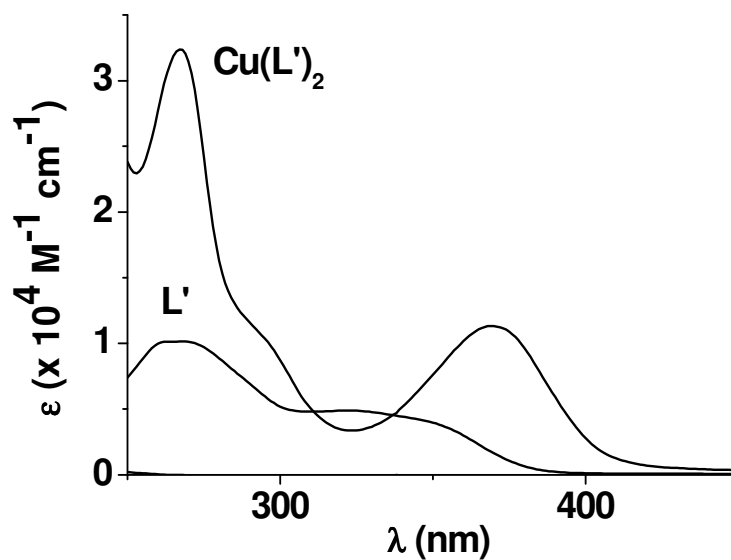

(b)

**Figure S15.** Electronic spectra of a) the Zn(II) pyochelin complexes and of b) the cupric pyochelin complexes at p[H] 2. Solvent: CH<sub>3</sub>OH/H<sub>2</sub>O (80/20 by weight); [HClO<sub>4</sub>]<sub>tot</sub> = 0.01 M; I = 0.1 M ((C<sub>2</sub>H<sub>5</sub>)<sub>4</sub>NClO<sub>4</sub>); T = 25.0(2) °C. L' designates the protonated pyochelin species at p[H] 2.0.



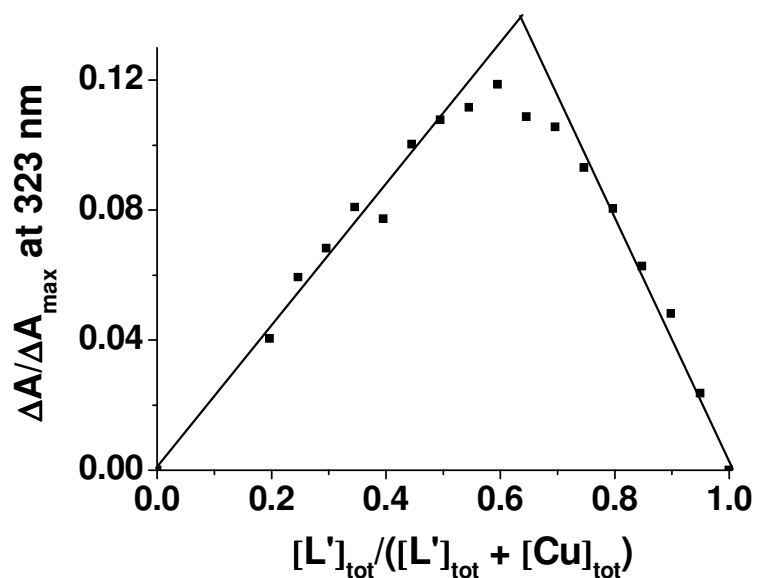

**Figure S16.** Job's plot ( $\Delta A/\Delta A_{\max}$  at 323 nm) upon mixing  $L'$  and Cu(II) at p[H] 2.0. ( $[L']_{\text{tot}} + [Cu(II)]_{\text{tot}} = 2.0 \times 10^{-4}$  M; solvent: MeOH/H<sub>2</sub>O (80/20 by weight);  $I = 0.1$  M ( $N(C_2H_5)_4ClO_4$ );  $T = 25.0(2)$  °C,  $\ell = 1$  cm.  $L'$  designates the protonated pyochelin species at p[H] 2.0.

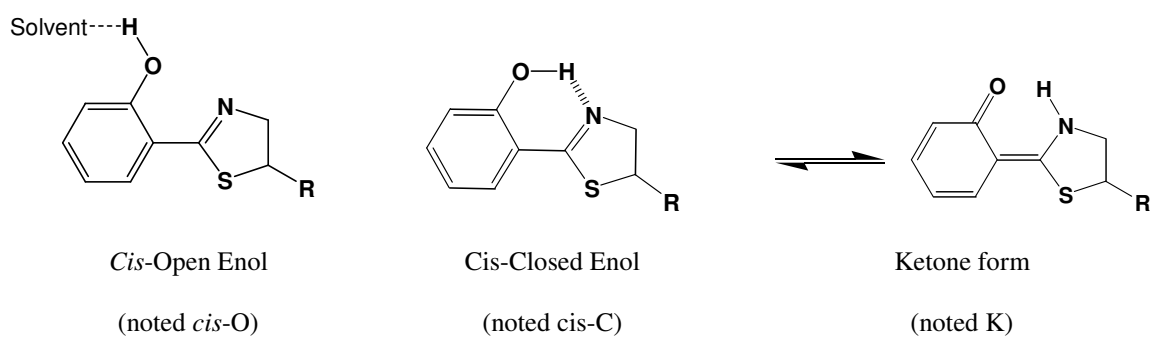

**Figure S17.** Possible conformers and tautomers of pyochelin in solution.

| Pseudomolecular Ions                                    | m/z experimental | m/z simulated |
|---------------------------------------------------------|------------------|---------------|
| $[\mathbf{L} + \text{Fe}]^+$                            | 377.8            | 377.2         |
| $[\mathbf{L} + \text{Fe} + \text{H}_2\text{O}]^+$       | 395.9            | 396.3         |
| $[\mathbf{L} + \text{Fe} + \text{ClO}_4 + \text{Na}]^+$ | 499.9            | 499.9         |
| $[2\mathbf{L} + \text{Fe} + 2\text{H}]^+$               | 701.9            | 702.0         |
| $[\mathbf{L} + \text{Cu} + \text{H}]^+$                 | 385.9            | 386.0         |
| $[\mathbf{L} + \text{Cu} + \text{Na}]^+$                | 407.9            | 408.0         |
| $[2\mathbf{L} + \text{Cu} + 3\text{H}]^+$               | 709.9            | 710.0         |
| $[\mathbf{L} + \text{Zn} + \text{H}]^+$                 | 381.0            | 380.9         |
| $[2\mathbf{L} + \text{Zn} + 3\text{H}]^+$               | 705.0            | 704.9         |

**Table S1.** Intensity maxima of the major pyochelin metal complexes (Fe(III), Cu(II), Zn(II)) observed by ESI-MS. Solvent: CH<sub>3</sub>OH/H<sub>2</sub>O (80/20 by weight); p[H] ~4-5; positive mode. **L** designates the fully deprotonated ligand.

| [Fe(III)] <sub>tot</sub><br>(× 10 <sup>-3</sup> M) | $(k_{\text{obs}} \pm 3\sigma) \text{ (s}^{-1}\text{)}$  |         |         |         |         |         |         |
|----------------------------------------------------|---------------------------------------------------------|---------|---------|---------|---------|---------|---------|
|                                                    | [H <sup>+</sup> ] <sub>tot</sub> × 10 <sup>-3</sup> (M) |         |         |         |         |         |         |
|                                                    | 3.09                                                    | 5.01    | 7.76    | 12.59   | 19.95   | 31.6    | 50.12   |
| 0.26                                               | 0.53(9)                                                 | 0.53(5) | 0.43(3) | 0.34(4) | 0.25(2) | 0.14(1) | 0.14(1) |
| 0.43                                               | 0.8(1)                                                  | 0.9(1)  | 0.58(6) | 0.48(4) | 0.31(3) | 0.20(3) | 0.19(2) |
| 0.69                                               | 1.3(2)                                                  | 1.4(2)  | 0.9(1)  | 0.74(6) | 0.53(5) | 0.35(3) | 0.25(4) |
| 0.86                                               | 1.9(2)                                                  | 1.8(2)  | 1.0(1)  | 0.85(8) | 0.72(7) | 0.39(4) | 0.45(4) |
| 1.30                                               | 2.7(5)                                                  | 2.4(4)  | 1.8(2)  | 1.3(2)  |         |         |         |
| 1.73                                               | 2.9(5)                                                  | 2.8(6)  | 1.8(3)  | 1.8(3)  |         |         |         |
| 2.16                                               | 3.8(7)                                                  | 3.5(7)  | 2.4(6)  | 2.1(4)  |         |         |         |

**Table S2.** Variation of the pseudo-first order rate constants versus the total concentration of iron(III) and proton. Solvent: CH<sub>3</sub>OH/H<sub>2</sub>O (80/20 by weight); *I* = 0.1 M ((C<sub>2</sub>H<sub>5</sub>)<sub>4</sub>NClO<sub>4</sub>); *T* = 25.0 (2) °C; [L]<sub>tot</sub> = 8.65 × 10<sup>-6</sup> M.

| $\lambda_{\max}$ (nm) ( $\epsilon \times 10^3$ M <sup>-1</sup> cm <sup>-1</sup> ) |               |                                  |           |
|-----------------------------------------------------------------------------------|---------------|----------------------------------|-----------|
|                                                                                   | Pyochelin (L) |                                  | HPT       |
| <b>L<sup>2-</sup></b>                                                             | -             | HPT <sup>-</sup>                 | 358 (4.8) |
|                                                                                   |               |                                  | 277 (3.0) |
| <b>LH<sup>-</sup></b>                                                             | 313 (4.9)     | (HPT)H                           | 320 (4.6) |
|                                                                                   | 252 (11.0)    |                                  | 290 (3.6) |
| <b>LH<sub>2</sub></b>                                                             | 313 (0.49)    |                                  |           |
|                                                                                   | 252 (11.0)    |                                  |           |
| <b>LH<sub>3</sub><sup>+</sup></b>                                                 | 345 (6.5)     | (HPT)H <sub>2</sub> <sup>+</sup> | 340 (4.6) |
|                                                                                   | 271 (14.0)    |                                  | 300 (4.4) |

**Table S3.** Spectrophotometric data ( $\lambda_{\max}$  ( $\epsilon \times 10^3$ ) [nm (M<sup>-1</sup> cm<sup>-1</sup>)] of pyochelin (L) and HPT protonated species. Solvent: CH<sub>3</sub>OH/H<sub>2</sub>O (80/20 by weight);  $I = 0.1$  M;  $T = 25.0(2)$  °C. The uncertainties on the  $\lambda_{\max}$  and  $\epsilon^{\lambda_{\max}}$  are 1 nm and 5%, respectively.

|                                | $\lambda_{\max}$ (nm) ( $\epsilon \times 10^4 \text{ M}^{-1} \text{ cm}^{-1}$ ) |             |             |
|--------------------------------|---------------------------------------------------------------------------------|-------------|-------------|
|                                | Zn(II)                                                                          | Cu(II)      | Fe(III)     |
| ML                             | /                                                                               | /           | 422(0.293)  |
|                                |                                                                                 |             | 524(0.182)  |
| ML <sub>2</sub> H <sub>2</sub> | 354(0.38)                                                                       | 440 (0.05)  |             |
|                                | 310 (0.73)                                                                      | 364 (0.62)  | /           |
|                                | 257 (2.03)                                                                      | 310 (0.78)  |             |
|                                |                                                                                 | 261 (2.37)  |             |
| ML <sub>2</sub> H              | 358 (0.89)                                                                      | 440 (0.06)  |             |
|                                | 260 (1.70)                                                                      | 363(0.68)   | /           |
|                                |                                                                                 | 316 (1.26)  |             |
|                                |                                                                                 | 255 (3.39)  |             |
| ML <sub>2</sub>                | 360 (1.18)                                                                      | 489 (0.058) | 414 (0.386) |
|                                | 266 (1.84)                                                                      | 362 (0.94)  | 493 (0.222) |
|                                |                                                                                 | 320 (1.12)  |             |
|                                |                                                                                 | 255 (3.40)  |             |
| ML(OH) <sub>2</sub>            | /                                                                               | /           | 486(0.13)   |

**Table S4.** Spectrophotometric data ( $\lambda_{\max}$  ( $\epsilon \times 10^4$ ) [nm ( $\text{M}^{-1} \text{ cm}^{-1}$ )] of pyochelin (L) Zn(II), Cu(II) and Fe(III) complexes. Solvent: CH<sub>3</sub>OH/H<sub>2</sub>O (80/20 by weight); I = 0.1 M; T = 25.0(2) °C. The uncertainties on the  $\lambda_{\max}$  and  $\epsilon^{\lambda_{\max}}$  are 1 nm and 5%, respectively.
